# Supplementary material for: Transcriptomic analysis of melon/squash graft junction reveals molecular mechanisms potentially underlying the graft union development
Source: PeerJ. 2021 Dec 13;9:e12569. doi: 10.7717/peerj.12569 (PMC8675255; doi:10.7717/peerj.12569)
Supplement: Supplemental Information 5 [file peerj-09-12569-s005.xlsx]

## Sheet: Sheet1
Table S2 The information of KEGGs enrichment
KEGGs enrichment using Melon (DHL92) v3.6.1 Genome (IL stage vs.CA stage)
#Kegg_pathway	ko_id	Cluster_frequency	Genome_frequency	P-value	Corrected_P-value	rich_factor
Phenylpropanoid biosynthesis	ko00940	33 out of 340 9.70588235294118%	169 out of 4875 3.46666666666667%	3.37336e-08	3.30589e-06	2.79977
Carbon metabolism	ko01200	36 out of 340 10.5882352941176%	296 out of 4875 6.07179487179487%	0.000591595	0.0579763	1.74384
Carbon fixation in photosynthetic organisms	ko00710	14 out of 340 4.11764705882353%	79 out of 4875 1.62051282051282%	0.000954166	0.0935083	2.54095
Glycine, serine and threonine metabolism	ko00260	15 out of 340 4.41176470588235%	90 out of 4875 1.84615384615385%	0.00122536	0.120085	2.38971
Valine, leucine and isoleucine degradation	ko00280	9 out of 340 2.64705882352941%	44 out of 4875 0.902564102564103%	0.00280601	0.274989	2.93282
Plant hormone signal transduction	ko04075	32 out of 340 9.41176470588235%	282 out of 4875 5.78461538461538%	0.00370161	0.362758	1.62703
Biosynthesis of amino acids	ko01230	29 out of 340 8.52941176470588%	260 out of 4875 5.33333333333333%	0.00717824	0.703467	1.59926
Glycolysis / Gluconeogenesis	ko00010	18 out of 340 5.29411764705882%	142 out of 4875 2.91282051282051%	0.00921772	0.903337	1.81752
Cutin, suberine and wax biosynthesis	ko00073	6 out of 340 1.76470588235294%	27 out of 4875 0.553846153846154%	0.00930586	0.911974	3.18627
Glycosphingolipid biosynthesis - ganglio series	ko00604	1 out of 340 0.294117647058824%	5 out of 4875 0.102564102564103%	0.303459	1	2.86765
Lysine degradation	ko00310	4 out of 340 1.17647058823529%	21 out of 4875 0.430769230769231%	0.0541005	1	2.73109
Arginine biosynthesis	ko00220	8 out of 340 2.35294117647059%	46 out of 4875 0.943589743589744%	0.0129828	1	2.49361
Nitrogen metabolism	ko00910	6 out of 340 1.76470588235294%	35 out of 4875 0.717948717948718%	0.0319409	1	2.45798
beta-Alanine metabolism	ko00410	7 out of 340 2.05882352941176%	42 out of 4875 0.861538461538462%	0.0244475	1	2.38971
Ubiquinone and other terpenoid-quinone biosynthesis	ko00130	7 out of 340 2.05882352941176%	42 out of 4875 0.861538461538462%	0.0244475	1	2.38971
Other glycan degradation	ko00511	3 out of 340 0.882352941176471%	19 out of 4875 0.38974358974359%	0.142439	1	2.26393
Phenylalanine metabolism	ko00360	9 out of 340 2.64705882352941%	61 out of 4875 1.25128205128205%	0.0241861	1	2.11548
Circadian rhythm - plant	ko04712	6 out of 340 1.76470588235294%	41 out of 4875 0.841025641025641%	0.0625325	1	2.09828
Photosynthesis - antenna proteins	ko00196	3 out of 340 0.882352941176471%	21 out of 4875 0.430769230769231%	0.176967	1	2.04832
Alanine, aspartate and glutamate metabolism	ko00250	12 out of 340 3.52941176470588%	85 out of 4875 1.74358974358974%	0.0140342	1	2.02422
2-Oxocarboxylic acid metabolism	ko01210	8 out of 340 2.35294117647059%	58 out of 4875 1.18974358974359%	0.04633	1	1.97769
Fructose and mannose metabolism	ko00051	8 out of 340 2.35294117647059%	58 out of 4875 1.18974358974359%	0.04633	1	1.97769
ABC transporters	ko02010	3 out of 340 0.882352941176471%	22 out of 4875 0.451282051282051%	0.19502	1	1.95521
Galactose metabolism	ko00052	8 out of 340 2.35294117647059%	59 out of 4875 1.21025641025641%	0.0504921	1	1.94417
Pentose phosphate pathway	ko00030	8 out of 340 2.35294117647059%	59 out of 4875 1.21025641025641%	0.0504921	1	1.94417
Glyoxylate and dicarboxylate metabolism	ko00630	11 out of 340 3.23529411764706%	82 out of 4875 1.68205128205128%	0.025897	1	1.92342
Steroid biosynthesis	ko00100	4 out of 340 1.17647058823529%	30 out of 4875 0.615384615384615%	0.15295	1	1.91176
Glycosphingolipid biosynthesis - globo series	ko00603	1 out of 340 0.294117647058824%	8 out of 4875 0.164102564102564%	0.439424	1	1.79228
Valine, leucine and isoleucine biosynthesis	ko00290	2 out of 340 0.588235294117647%	16 out of 4875 0.328205128205128%	0.308232	1	1.79228
Sesquiterpenoid and triterpenoid biosynthesis	ko00909	2 out of 340 0.588235294117647%	16 out of 4875 0.328205128205128%	0.308232	1	1.79228
Tropane, piperidine and pyridine alkaloid biosynthesis	ko00960	3 out of 340 0.882352941176471%	25 out of 4875 0.512820512820513%	0.251452	1	1.72059
Nicotinate and nicotinamide metabolism	ko00760	2 out of 340 0.588235294117647%	17 out of 4875 0.348717948717949%	0.334593	1	1.68685
Stilbenoid, diarylheptanoid and gingerol biosynthesis	ko00945	2 out of 340 0.588235294117647%	17 out of 4875 0.348717948717949%	0.334593	1	1.68685
Carotenoid biosynthesis	ko00906	4 out of 340 1.17647058823529%	34 out of 4875 0.697435897435897%	0.209868	1	1.68685
Cyanoamino acid metabolism	ko00460	7 out of 340 2.05882352941176%	60 out of 4875 1.23076923076923%	0.1219	1	1.67279
Thiamine metabolism	ko00730	2 out of 340 0.588235294117647%	18 out of 4875 0.369230769230769%	0.360652	1	1.59314
Histidine metabolism	ko00340	2 out of 340 0.588235294117647%	18 out of 4875 0.369230769230769%	0.360652	1	1.59314
Ascorbate and aldarate metabolism	ko00053	5 out of 340 1.47058823529412%	45 out of 4875 0.923076923076923%	0.202102	1	1.59314
Starch and sucrose metabolism	ko00500	29 out of 340 8.52941176470588%	268 out of 4875 5.4974358974359%	0.0108184	1	1.55153
Glycosaminoglycan degradation	ko00531	2 out of 340 0.588235294117647%	19 out of 4875 0.38974358974359%	0.386324	1	1.50929
Glycerolipid metabolism	ko00561	6 out of 340 1.76470588235294%	58 out of 4875 1.18974358974359%	0.215347	1	1.48327
Biotin metabolism	ko00780	2 out of 340 0.588235294117647%	20 out of 4875 0.41025641025641%	0.411536	1	1.43382
Lysine biosynthesis	ko00300	1 out of 340 0.294117647058824%	10 out of 4875 0.205128205128205%	0.515018	1	1.43382
Fatty acid biosynthesis	ko00061	4 out of 340 1.17647058823529%	41 out of 4875 0.841025641025641%	0.319859	1	1.39885
Pentose and glucuronate interconversions	ko00040	13 out of 340 3.82352941176471%	135 out of 4875 2.76923076923077%	0.145613	1	1.38072
Glutathione metabolism	ko00480	9 out of 340 2.64705882352941%	94 out of 4875 1.92820512820513%	0.206869	1	1.37281
Taurine and hypotaurine metabolism	ko00430	1 out of 340 0.294117647058824%	11 out of 4875 0.225641025641026%	0.548912	1	1.30348
Terpenoid backbone biosynthesis	ko00900	5 out of 340 1.47058823529412%	55 out of 4875 1.12820512820513%	0.337605	1	1.30348
Riboflavin metabolism	ko00740	1 out of 340 0.294117647058824%	11 out of 4875 0.225641025641026%	0.548912	1	1.30348
Tyrosine metabolism	ko00350	4 out of 340 1.17647058823529%	45 out of 4875 0.923076923076923%	0.384875	1	1.27451
Diterpenoid biosynthesis	ko00904	3 out of 340 0.882352941176471%	34 out of 4875 0.697435897435897%	0.426542	1	1.26514
Arginine and proline metabolism	ko00330	5 out of 340 1.47058823529412%	57 out of 4875 1.16923076923077%	0.365977	1	1.25774
alpha-Linolenic acid metabolism	ko00592	5 out of 340 1.47058823529412%	57 out of 4875 1.16923076923077%	0.365977	1	1.25774
Cysteine and methionine metabolism	ko00270	8 out of 340 2.35294117647059%	92 out of 4875 1.88717948717949%	0.310933	1	1.2468
Linoleic acid metabolism	ko00591	3 out of 340 0.882352941176471%	35 out of 4875 0.717948717948718%	0.445442	1	1.22899
Flavonoid biosynthesis	ko00941	2 out of 340 0.588235294117647%	24 out of 4875 0.492307692307692%	0.506723	1	1.19485
Peroxisome	ko04146	7 out of 340 2.05882352941176%	85 out of 4875 1.74358974358974%	0.38146	1	1.1808
Fatty acid degradation	ko00071	3 out of 340 0.882352941176471%	37 out of 4875 0.758974358974359%	0.482461	1	1.16256
Isoquinoline alkaloid biosynthesis	ko00950	2 out of 340 0.588235294117647%	25 out of 4875 0.512820512820513%	0.528921	1	1.14706
Tryptophan metabolism	ko00380	3 out of 340 0.882352941176471%	39 out of 4875 0.8%	0.518272	1	1.10294
Ubiquitin mediated proteolysis	ko04120	8 out of 340 2.35294117647059%	108 out of 4875 2.21538461538462%	0.483676	1	1.06209
Pyruvate metabolism	ko00620	8 out of 340 2.35294117647059%	110 out of 4875 2.25641025641026%	0.50491	1	1.04278
Arachidonic acid metabolism	ko00590	1 out of 340 0.294117647058824%	14 out of 4875 0.287179487179487%	0.637065	1	1.02416
Amino sugar and nucleotide sugar metabolism	ko00520	9 out of 340 2.64705882352941%	127 out of 4875 2.60512820512821%	0.531024	1	1.0161
Phagosome	ko04145	5 out of 340 1.47058823529412%	71 out of 4875 1.45641025641026%	0.558313	1	1.00973
Plant-pathogen interaction	ko04626	9 out of 340 2.64705882352941%	134 out of 4875 2.74871794871795%	0.597434	1	0.963016
Sulfur metabolism	ko00920	3 out of 340 0.882352941176471%	45 out of 4875 0.923076923076923%	0.617001	1	0.955882
Porphyrin and chlorophyll metabolism	ko00860	3 out of 340 0.882352941176471%	46 out of 4875 0.943589743589744%	0.632066	1	0.935102
Inositol phosphate metabolism	ko00562	4 out of 340 1.17647058823529%	63 out of 4875 1.29230769230769%	0.64985	1	0.910364
Photosynthesis	ko00195	8 out of 340 2.35294117647059%	127 out of 4875 2.60512820512821%	0.670231	1	0.903196
Fatty acid metabolism	ko01212	4 out of 340 1.17647058823529%	64 out of 4875 1.31282051282051%	0.662197	1	0.89614
Phenylalanine, tyrosine and tryptophan biosynthesis	ko00400	3 out of 340 0.882352941176471%	49 out of 4875 1.00512820512821%	0.674766	1	0.877851
Citrate cycle (TCA cycle)	ko00020	3 out of 340 0.882352941176471%	50 out of 4875 1.02564102564103%	0.688163	1	0.860294
Glycerophospholipid metabolism	ko00564	5 out of 340 1.47058823529412%	88 out of 4875 1.80512820512821%	0.745231	1	0.814672
Folate biosynthesis	ko00790	1 out of 340 0.294117647058824%	18 out of 4875 0.369230769230769%	0.728466	1	0.796569
RNA degradation	ko03018	6 out of 340 1.76470588235294%	111 out of 4875 2.27692307692308%	0.796987	1	0.77504
Propanoate metabolism	ko00640	2 out of 340 0.588235294117647%	39 out of 4875 0.8%	0.767205	1	0.735294
Base excision repair	ko03410	2 out of 340 0.588235294117647%	40 out of 4875 0.82051282051282%	0.779391	1	0.716912
Pyrimidine metabolism	ko00240	7 out of 340 2.05882352941176%	146 out of 4875 2.99487179487179%	0.893243	1	0.68745
Protein processing in endoplasmic reticulum	ko04141	9 out of 340 2.64705882352941%	201 out of 4875 4.12307692307692%	0.948407	1	0.642011
Vitamin B6 metabolism	ko00750	1 out of 340 0.294117647058824%	23 out of 4875 0.471794871794872%	0.811129	1	0.623402
Selenocompound metabolism	ko00450	1 out of 340 0.294117647058824%	23 out of 4875 0.471794871794872%	0.811129	1	0.623402
Pantothenate and CoA biosynthesis	ko00770	1 out of 340 0.294117647058824%	24 out of 4875 0.492307692307692%	0.824364	1	0.597426
Ether lipid metabolism	ko00565	1 out of 340 0.294117647058824%	24 out of 4875 0.492307692307692%	0.824364	1	0.597426
Ribosome	ko03010	15 out of 340 4.41176470588235%	371 out of 4875 7.61025641025641%	0.994937	1	0.579713
Fatty acid elongation	ko00062	1 out of 340 0.294117647058824%	25 out of 4875 0.512820512820513%	0.836674	1	0.573529
Butanoate metabolism	ko00650	2 out of 340 0.588235294117647%	50 out of 4875 1.02564102564103%	0.873471	1	0.573529
Phosphatidylinositol signaling system	ko04070	2 out of 340 0.588235294117647%	57 out of 4875 1.16923076923077%	0.915651	1	0.503096
Ribosome biogenesis in eukaryotes	ko03008	3 out of 340 0.882352941176471%	89 out of 4875 1.82564102564103%	0.953741	1	0.483311
mRNA surveillance pathway	ko03015	3 out of 340 0.882352941176471%	109 out of 4875 2.23589743589744%	0.984829	1	0.39463
Regulation of autophagy	ko04140	1 out of 340 0.294117647058824%	37 out of 4875 0.758974358974359%	0.931793	1	0.38752
Oxidative phosphorylation	ko00190	5 out of 340 1.47058823529412%	189 out of 4875 3.87692307692308%	0.997768	1	0.379318
Purine metabolism	ko00230	5 out of 340 1.47058823529412%	201 out of 4875 4.12307692307692%	0.998852	1	0.356673
Endocytosis	ko04144	4 out of 340 1.17647058823529%	173 out of 4875 3.54871794871795%	0.998531	1	0.33152
DNA replication	ko03030	1 out of 340 0.294117647058824%	55 out of 4875 1.12820512820513%	0.98167	1	0.260695
Aminoacyl-tRNA biosynthesis	ko00970	1 out of 340 0.294117647058824%	58 out of 4875 1.18974358974359%	0.985283	1	0.247211
Spliceosome	ko03040	3 out of 340 0.882352941176471%	194 out of 4875 3.97948717948718%	0.999921	1	0.221725
RNA transport	ko03013	2 out of 340 0.588235294117647%	147 out of 4875 3.01538461538462%	0.999746	1	0.195078
KEGGs enrichment using Melon (DHL92) v3.6.1 Genome (CA stage vs.VB stage)
#Kegg_pathway	ko_id	Cluster_frequency	Genome_frequency	P-value	Corrected_P-value	rich_factor
Linoleic acid metabolism	ko00591	13 out of 221 5.88235294117647%	35 out of 4875 0.717948717948718%	1.46595e-09	1.33402e-07	8.19328
Phenylpropanoid biosynthesis	ko00940	23 out of 221 10.4072398190045%	169 out of 4875 3.46666666666667%	1.59327e-06	0.000144988	3.00209
alpha-Linolenic acid metabolism	ko00592	10 out of 221 4.52488687782805%	57 out of 4875 1.16923076923077%	0.000197858	0.0180051	3.86997
Sesquiterpenoid and triterpenoid biosynthesis	ko00909	5 out of 221 2.26244343891403%	16 out of 4875 0.328205128205128%	0.000530188	0.0482471	6.89338
Valine, leucine and isoleucine degradation	ko00280	8 out of 221 3.61990950226244%	44 out of 4875 0.902564102564103%	0.000676751	0.0615843	4.0107
Cyanoamino acid metabolism	ko00460	9 out of 221 4.07239819004525%	60 out of 4875 1.23076923076923%	0.00134699	0.122576	3.30882
beta-Alanine metabolism	ko00410	7 out of 221 3.16742081447964%	42 out of 4875 0.861538461538462%	0.00248417	0.22606	3.67647
Cysteine and methionine metabolism	ko00270	11 out of 221 4.97737556561086%	92 out of 4875 1.88717948717949%	0.00271923	0.24745	2.63747
Zeatin biosynthesis	ko00908	5 out of 221 2.26244343891403%	25 out of 4875 0.512820512820513%	0.00461861	0.420294	4.41176
Fatty acid degradation	ko00071	6 out of 221 2.71493212669683%	37 out of 4875 0.758974358974359%	0.00578994	0.526884	3.57711
Circadian rhythm - plant	ko04712	6 out of 221 2.71493212669683%	41 out of 4875 0.841025641025641%	0.00963392	0.876687	3.22812
Monoterpenoid biosynthesis	ko00902	1 out of 221 0.452488687782805%	4 out of 4875 0.0820512820512821%	0.16942	1	5.51471
Lysine biosynthesis	ko00300	2 out of 221 0.904977375565611%	10 out of 4875 0.205128205128205%	0.0724257	1	4.41176
Lysine degradation	ko00310	3 out of 221 1.35746606334842%	21 out of 4875 0.430769230769231%	0.0669596	1	3.15126
AGE-RAGE signaling pathway in diabetic complications	ko04933	2 out of 221 0.904977375565611%	14 out of 4875 0.287179487179487%	0.130264	1	3.15126
Steroid biosynthesis	ko00100	4 out of 221 1.80995475113122%	30 out of 4875 0.615384615384615%	0.0446811	1	2.94118
Monobactam biosynthesis	ko00261	1 out of 221 0.452488687782805%	8 out of 4875 0.164102564102564%	0.310244	1	2.75735
Glycosphingolipid biosynthesis - globo series	ko00603	1 out of 221 0.452488687782805%	8 out of 4875 0.164102564102564%	0.310244	1	2.75735
Flavonoid biosynthesis	ko00941	3 out of 221 1.35746606334842%	24 out of 4875 0.492307692307692%	0.0924053	1	2.75735
Tropane, piperidine and pyridine alkaloid biosynthesis	ko00960	3 out of 221 1.35746606334842%	25 out of 4875 0.512820512820513%	0.101656	1	2.64706
Isoquinoline alkaloid biosynthesis	ko00950	3 out of 221 1.35746606334842%	25 out of 4875 0.512820512820513%	0.101656	1	2.64706
Carotenoid biosynthesis	ko00906	4 out of 221 1.80995475113122%	34 out of 4875 0.697435897435897%	0.0658093	1	2.59516
Sphingolipid metabolism	ko00600	3 out of 221 1.35746606334842%	26 out of 4875 0.533333333333333%	0.111259	1	2.54525
Nitrogen metabolism	ko00910	4 out of 221 1.80995475113122%	35 out of 4875 0.717948717948718%	0.0717777	1	2.52101
Cutin, suberine and wax biosynthesis	ko00073	3 out of 221 1.35746606334842%	27 out of 4875 0.553846153846154%	0.121194	1	2.45098
Thiamine metabolism	ko00730	2 out of 221 0.904977375565611%	18 out of 4875 0.369230769230769%	0.195176	1	2.45098
Histidine metabolism	ko00340	2 out of 221 0.904977375565611%	18 out of 4875 0.369230769230769%	0.195176	1	2.45098
Ascorbate and aldarate metabolism	ko00053	5 out of 221 2.26244343891403%	45 out of 4875 0.923076923076923%	0.051232	1	2.45098
Photosynthesis - antenna proteins	ko00196	2 out of 221 0.904977375565611%	21 out of 4875 0.430769230769231%	0.24603	1	2.10084
Biosynthesis of unsaturated fatty acids	ko01040	2 out of 221 0.904977375565611%	21 out of 4875 0.430769230769231%	0.24603	1	2.10084
Taurine and hypotaurine metabolism	ko00430	1 out of 221 0.452488687782805%	11 out of 4875 0.225641025641026%	0.400021	1	2.00535
ABC transporters	ko02010	2 out of 221 0.904977375565611%	22 out of 4875 0.451282051282051%	0.263129	1	2.00535
Glycine, serine and threonine metabolism	ko00260	8 out of 221 3.61990950226244%	90 out of 4875 1.84615384615385%	0.0501259	1	1.96078
Arginine and proline metabolism	ko00330	5 out of 221 2.26244343891403%	57 out of 4875 1.16923076923077%	0.114461	1	1.93498
Glycerolipid metabolism	ko00561	5 out of 221 2.26244343891403%	58 out of 4875 1.18974358974359%	0.120915	1	1.90162
Glutathione metabolism	ko00480	8 out of 221 3.61990950226244%	94 out of 4875 1.92820512820513%	0.0618441	1	1.87735
Alanine, aspartate and glutamate metabolism	ko00250	7 out of 221 3.16742081447964%	85 out of 4875 1.74358974358974%	0.0893057	1	1.81661
Phenylalanine metabolism	ko00360	5 out of 221 2.26244343891403%	61 out of 4875 1.25128205128205%	0.141262	1	1.8081
Fatty acid elongation	ko00062	2 out of 221 0.904977375565611%	25 out of 4875 0.512820512820513%	0.314323	1	1.76471
Plant hormone signal transduction	ko04075	21 out of 221 9.50226244343891%	282 out of 4875 5.78461538461538%	0.0159101	1	1.64268
Pentose and glucuronate interconversions	ko00040	10 out of 221 4.52488687782805%	135 out of 4875 2.76923076923077%	0.0846161	1	1.63399
Glyoxylate and dicarboxylate metabolism	ko00630	6 out of 221 2.71493212669683%	82 out of 4875 1.68205128205128%	0.166417	1	1.61406
Ubiquinone and other terpenoid-quinone biosynthesis	ko00130	3 out of 221 1.35746606334842%	42 out of 4875 0.861538461538462%	0.29653	1	1.57563
Arachidonic acid metabolism	ko00590	1 out of 221 0.452488687782805%	14 out of 4875 0.287179487179487%	0.478158	1	1.57563
Amino sugar and nucleotide sugar metabolism	ko00520	9 out of 221 4.07239819004525%	127 out of 4875 2.60512820512821%	0.12094	1	1.56322
Phagosome	ko04145	5 out of 221 2.26244343891403%	71 out of 4875 1.45641025641026%	0.218297	1	1.55344
Glycerophospholipid metabolism	ko00564	6 out of 221 2.71493212669683%	88 out of 4875 1.80512820512821%	0.207954	1	1.50401
Tyrosine metabolism	ko00350	3 out of 221 1.35746606334842%	45 out of 4875 0.923076923076923%	0.334347	1	1.47059
Starch and sucrose metabolism	ko00500	17 out of 221 7.69230769230769%	268 out of 4875 5.4974358974359%	0.0983145	1	1.39925
Fatty acid metabolism	ko01212	4 out of 221 1.80995475113122%	64 out of 4875 1.31282051282051%	0.329894	1	1.37868
Valine, leucine and isoleucine biosynthesis	ko00290	1 out of 221 0.452488687782805%	16 out of 4875 0.328205128205128%	0.524534	1	1.37868
Phenylalanine, tyrosine and tryptophan biosynthesis	ko00400	3 out of 221 1.35746606334842%	49 out of 4875 1.00512820512821%	0.384589	1	1.35054
Butanoate metabolism	ko00650	3 out of 221 1.35746606334842%	50 out of 4875 1.02564102564103%	0.397036	1	1.32353
Diterpenoid biosynthesis	ko00904	2 out of 221 0.904977375565611%	34 out of 4875 0.697435897435897%	0.460639	1	1.29758
Peroxisome	ko04146	5 out of 221 2.26244343891403%	85 out of 4875 1.74358974358974%	0.341486	1	1.29758
Stilbenoid, diarylheptanoid and gingerol biosynthesis	ko00945	1 out of 221 0.452488687782805%	17 out of 4875 0.348717948717949%	0.54616	1	1.29758
Terpenoid backbone biosynthesis	ko00900	3 out of 221 1.35746606334842%	55 out of 4875 1.12820512820513%	0.458076	1	1.20321
Pyruvate metabolism	ko00620	6 out of 221 2.71493212669683%	110 out of 4875 2.25641025641026%	0.381485	1	1.20321
One carbon pool by folate	ko00670	1 out of 221 0.452488687782805%	19 out of 4875 0.38974358974359%	0.586517	1	1.16099
Other glycan degradation	ko00511	1 out of 221 0.452488687782805%	19 out of 4875 0.38974358974359%	0.586517	1	1.16099
Glycosaminoglycan degradation	ko00531	1 out of 221 0.452488687782805%	19 out of 4875 0.38974358974359%	0.586517	1	1.16099
Propanoate metabolism	ko00640	2 out of 221 0.904977375565611%	39 out of 4875 0.8%	0.533851	1	1.13122
Tryptophan metabolism	ko00380	2 out of 221 0.904977375565611%	39 out of 4875 0.8%	0.533851	1	1.13122
Galactose metabolism	ko00052	3 out of 221 1.35746606334842%	59 out of 4875 1.21025641025641%	0.504977	1	1.12164
Biosynthesis of amino acids	ko01230	13 out of 221 5.88235294117647%	260 out of 4875 5.33333333333333%	0.398193	1	1.10294
Ubiquitin mediated proteolysis	ko04120	5 out of 221 2.26244343891403%	108 out of 4875 2.21538461538462%	0.546548	1	1.02124
Plant-pathogen interaction	ko04626	6 out of 221 2.71493212669683%	134 out of 4875 2.74871794871795%	0.572534	1	0.987709
Sulfur metabolism	ko00920	2 out of 221 0.904977375565611%	45 out of 4875 0.923076923076923%	0.612362	1	0.980392
Carbon metabolism	ko01200	13 out of 221 5.88235294117647%	296 out of 4875 6.07179487179487%	0.590281	1	0.9688
Selenocompound metabolism	ko00450	1 out of 221 0.452488687782805%	23 out of 4875 0.471794871794872%	0.656824	1	0.959079
Porphyrin and chlorophyll metabolism	ko00860	2 out of 221 0.904977375565611%	46 out of 4875 0.943589743589744%	0.624426	1	0.959079
Glycolysis / Gluconeogenesis	ko00010	6 out of 221 2.71493212669683%	142 out of 4875 2.91282051282051%	0.629818	1	0.932063
Pantothenate and CoA biosynthesis	ko00770	1 out of 221 0.452488687782805%	24 out of 4875 0.492307692307692%	0.672455	1	0.919118
Ether lipid metabolism	ko00565	1 out of 221 0.452488687782805%	24 out of 4875 0.492307692307692%	0.672455	1	0.919118
Carbon fixation in photosynthetic organisms	ko00710	3 out of 221 1.35746606334842%	79 out of 4875 1.62051282051282%	0.702755	1	0.837677
2-Oxocarboxylic acid metabolism	ko01210	2 out of 221 0.904977375565611%	58 out of 4875 1.18974358974359%	0.747186	1	0.760649
Fructose and mannose metabolism	ko00051	2 out of 221 0.904977375565611%	58 out of 4875 1.18974358974359%	0.747186	1	0.760649
Pentose phosphate pathway	ko00030	2 out of 221 0.904977375565611%	59 out of 4875 1.21025641025641%	0.755684	1	0.747757
Base excision repair	ko03410	1 out of 221 0.452488687782805%	40 out of 4875 0.82051282051282%	0.84485	1	0.551471
Fatty acid biosynthesis	ko00061	1 out of 221 0.452488687782805%	41 out of 4875 0.841025641025641%	0.851941	1	0.53802
Arginine biosynthesis	ko00220	1 out of 221 0.452488687782805%	46 out of 4875 0.943589743589744%	0.882841	1	0.47954
Citrate cycle (TCA cycle)	ko00020	1 out of 221 0.452488687782805%	50 out of 4875 1.02564102564103%	0.902866	1	0.441176
Protein processing in endoplasmic reticulum	ko04141	4 out of 221 1.80995475113122%	201 out of 4875 4.12307692307692%	0.983905	1	0.438982
Inositol phosphate metabolism	ko00562	1 out of 221 0.452488687782805%	63 out of 4875 1.29230769230769%	0.947237	1	0.35014
Photosynthesis	ko00195	2 out of 221 0.904977375565611%	127 out of 4875 2.60512820512821%	0.981636	1	0.347383
RNA polymerase	ko03020	1 out of 221 0.452488687782805%	66 out of 4875 1.35384615384615%	0.95418	1	0.334225
Purine metabolism	ko00230	3 out of 221 1.35746606334842%	201 out of 4875 4.12307692307692%	0.99561	1	0.329236
Pyrimidine metabolism	ko00240	2 out of 221 0.904977375565611%	146 out of 4875 2.99487179487179%	0.991603	1	0.302176
RNA degradation	ko03018	1 out of 221 0.452488687782805%	111 out of 4875 2.27692307692308%	0.994538	1	0.198728
Endocytosis	ko04144	1 out of 221 0.452488687782805%	173 out of 4875 3.54871794871795%	0.999718	1	0.127508
Spliceosome	ko03040	1 out of 221 0.452488687782805%	194 out of 4875 3.97948717948718%	0.999898	1	0.113705
KEGGs enrichment using Cucurbita moschata (Rifu) Genome (IL stage vs.CA stage)
#Kegg_pathway	ko_id	Cluster_frequency	Genome_frequency	P-value	Corrected_P-value	rich_factor
Circadian rhythm - plant	ko04712	9 out of 118 7.6271186440678%	46 out of 5449 0.844191594788035%	4.33464e-07	3.12094e-05	9.03482
Cutin, suberine and wax biosynthesis	ko00073	6 out of 118 5.08474576271186%	35 out of 5449 0.642319691686548%	8.81998e-05	0.00635039	7.91622
Phenylpropanoid biosynthesis	ko00940	13 out of 118 11.0169491525424%	211 out of 5449 3.87227014131033%	0.000579253	0.0417062	2.84509
Photosynthesis - antenna proteins	ko00196	4 out of 118 3.38983050847458%	26 out of 5449 0.47715177096715%	0.00216111	0.1556	7.1043
Brassinosteroid biosynthesis	ko00905	1 out of 118 0.847457627118644%	14 out of 5449 0.256927876674619%	0.264258	1	3.29843
Vitamin B6 metabolism	ko00750	1 out of 118 0.847457627118644%	15 out of 5449 0.275279867865663%	0.280232	1	3.07853
alpha-Linolenic acid metabolism	ko00592	3 out of 118 2.54237288135593%	49 out of 5449 0.899247568361167%	0.0890152	1	2.82722
Thiamine metabolism	ko00730	1 out of 118 0.847457627118644%	17 out of 5449 0.311983850247752%	0.311155	1	2.71635
Photosynthesis	ko00195	5 out of 118 4.23728813559322%	92 out of 5449 1.68838318957607%	0.0484825	1	2.50967
Stilbenoid, diarylheptanoid and gingerol biosynthesis	ko00945	1 out of 118 0.847457627118644%	20 out of 5449 0.367039823820885%	0.355086	1	2.3089
Ribosome biogenesis in eukaryotes	ko03008	4 out of 118 3.38983050847458%	82 out of 5449 1.50486327766563%	0.101218	1	2.25258
Fatty acid elongation	ko00062	2 out of 118 1.69491525423729%	41 out of 5449 0.752431638832813%	0.222426	1	2.25258
Carbon fixation in photosynthetic organisms	ko00710	5 out of 118 4.23728813559322%	105 out of 5449 1.92695907505964%	0.0766153	1	2.19895
Nicotinate and nicotinamide metabolism	ko00760	1 out of 118 0.847457627118644%	21 out of 5449 0.385391815011929%	0.369104	1	2.19895
Glutathione metabolism	ko00480	4 out of 118 3.38983050847458%	87 out of 5449 1.59662323362085%	0.118937	1	2.12312
Sulfur metabolism	ko00920	2 out of 118 1.69491525423729%	44 out of 5449 0.807487612405946%	0.246585	1	2.099
Linoleic acid metabolism	ko00591	1 out of 118 0.847457627118644%	24 out of 5449 0.440447788585062%	0.409368	1	1.92408
Ascorbate and aldarate metabolism	ko00053	2 out of 118 1.69491525423729%	48 out of 5449 0.880895577170123%	0.278925	1	1.92408
Nitrogen metabolism	ko00910	2 out of 118 1.69491525423729%	50 out of 5449 0.917599559552211%	0.295079	1	1.84712
Arginine biosynthesis	ko00220	2 out of 118 1.69491525423729%	50 out of 5449 0.917599559552211%	0.295079	1	1.84712
Tropane, piperidine and pyridine alkaloid biosynthesis	ko00960	1 out of 118 0.847457627118644%	25 out of 5449 0.458799779776106%	0.422215	1	1.84712
Tyrosine metabolism	ko00350	2 out of 118 1.69491525423729%	52 out of 5449 0.9543035419343%	0.311184	1	1.77608
Flavonoid biosynthesis	ko00941	1 out of 118 0.847457627118644%	26 out of 5449 0.47715177096715%	0.434785	1	1.77608
Phenylalanine, tyrosine and tryptophan biosynthesis	ko00400	2 out of 118 1.69491525423729%	54 out of 5449 0.991007524316388%	0.327215	1	1.7103
Isoquinoline alkaloid biosynthesis	ko00950	1 out of 118 0.847457627118644%	27 out of 5449 0.495503762158194%	0.447084	1	1.7103
Cysteine and methionine metabolism	ko00270	4 out of 118 3.38983050847458%	115 out of 5449 2.11047898697009%	0.237926	1	1.60619
Selenocompound metabolism	ko00450	1 out of 118 0.847457627118644%	30 out of 5449 0.550559735731327%	0.48241	1	1.53927
Fatty acid metabolism	ko01212	3 out of 118 2.54237288135593%	94 out of 5449 1.72508717195816%	0.333081	1	1.47376
Plant hormone signal transduction	ko04075	12 out of 118 10.1694915254237%	382 out of 5449 7.0104606349789%	0.122218	1	1.45062
Pentose phosphate pathway	ko00030	2 out of 118 1.69491525423729%	64 out of 5449 1.17452743622683%	0.40552	1	1.44306
Plant-pathogen interaction	ko04626	5 out of 118 4.23728813559322%	162 out of 5449 2.97302257294916%	0.273562	1	1.42525
Glycerolipid metabolism	ko00561	2 out of 118 1.69491525423729%	67 out of 5449 1.22958340979996%	0.428202	1	1.37845
Biosynthesis of unsaturated fatty acids	ko01040	1 out of 118 0.847457627118644%	34 out of 5449 0.623967700495504%	0.526053	1	1.35818
Biosynthesis of amino acids	ko01230	8 out of 118 6.77966101694915%	279 out of 5449 5.12020554230134%	0.256659	1	1.3241
Steroid biosynthesis	ko00100	1 out of 118 0.847457627118644%	35 out of 5449 0.642319691686548%	0.536381	1	1.31937
Glycerophospholipid metabolism	ko00564	3 out of 118 2.54237288135593%	111 out of 5449 2.03707102220591%	0.433456	1	1.24805
Amino sugar and nucleotide sugar metabolism	ko00520	4 out of 118 3.38983050847458%	161 out of 5449 2.95467058175812%	0.463125	1	1.14728
Diterpenoid biosynthesis	ko00904	1 out of 118 0.847457627118644%	41 out of 5449 0.752431638832813%	0.593825	1	1.12629
Starch and sucrose metabolism	ko00500	8 out of 118 6.77966101694915%	330 out of 5449 6.05615709304459%	0.423852	1	1.11947
Regulation of autophagy	ko04140	1 out of 118 0.847457627118644%	43 out of 5449 0.789135621214902%	0.611359	1	1.07391
Protein processing in endoplasmic reticulum	ko04141	5 out of 118 4.23728813559322%	220 out of 5449 4.03743806202973%	0.52157	1	1.0495
Carotenoid biosynthesis	ko00906	1 out of 118 0.847457627118644%	44 out of 5449 0.807487612405946%	0.619842	1	1.0495
SNARE interactions in vesicular transport	ko04130	1 out of 118 0.847457627118644%	44 out of 5449 0.807487612405946%	0.619842	1	1.0495
Mismatch repair	ko03430	1 out of 118 0.847457627118644%	46 out of 5449 0.844191594788035%	0.636261	1	1.00387
Glyoxylate and dicarboxylate metabolism	ko00630	2 out of 118 1.69491525423729%	92 out of 5449 1.68838318957607%	0.597126	1	1.00387
Carbon metabolism	ko01200	7 out of 118 5.93220338983051%	329 out of 5449 6.03780510185355%	0.575589	1	0.98251
Homologous recombination	ko03440	1 out of 118 0.847457627118644%	49 out of 5449 0.899247568361167%	0.65958	1	0.942407
Ubiquinone and other terpenoid-quinone biosynthesis	ko00130	1 out of 118 0.847457627118644%	51 out of 5449 0.935951550743256%	0.674297	1	0.90545
Fatty acid degradation	ko00071	1 out of 118 0.847457627118644%	52 out of 5449 0.9543035419343%	0.681417	1	0.888038
Tryptophan metabolism	ko00380	1 out of 118 0.847457627118644%	52 out of 5449 0.9543035419343%	0.681417	1	0.888038
RNA degradation	ko03018	2 out of 118 1.69491525423729%	109 out of 5449 2.00036703982382%	0.689195	1	0.847302
DNA replication	ko03030	1 out of 118 0.847457627118644%	55 out of 5449 1.00935951550743%	0.701863	1	0.839599
Fatty acid biosynthesis	ko00061	1 out of 118 0.847457627118644%	57 out of 5449 1.04606349788952%	0.714766	1	0.81014
Terpenoid backbone biosynthesis	ko00900	1 out of 118 0.847457627118644%	57 out of 5449 1.04606349788952%	0.714766	1	0.81014
Pentose and glucuronate interconversions	ko00040	3 out of 118 2.54237288135593%	173 out of 5449 3.17489447605065%	0.73013	1	0.800774
Ubiquitin mediated proteolysis	ko04120	2 out of 118 1.69491525423729%	123 out of 5449 2.25729491649844%	0.751527	1	0.750861
Cyanoamino acid metabolism	ko00460	1 out of 118 0.847457627118644%	63 out of 5449 1.15617544503579%	0.750244	1	0.732984
Phenylalanine metabolism	ko00360	1 out of 118 0.847457627118644%	65 out of 5449 1.19287942741787%	0.761069	1	0.71043
2-Oxocarboxylic acid metabolism	ko01210	1 out of 118 0.847457627118644%	69 out of 5449 1.26628739218205%	0.781342	1	0.669246
Nucleotide excision repair	ko03420	1 out of 118 0.847457627118644%	71 out of 5449 1.30299137456414%	0.790829	1	0.650394
Spliceosome	ko03040	3 out of 118 2.54237288135593%	215 out of 5449 3.94567810607451%	0.851615	1	0.644344
Glycolysis / Gluconeogenesis	ko00010	2 out of 118 1.69491525423729%	145 out of 5449 2.66103872270141%	0.827854	1	0.636937
Alanine, aspartate and glutamate metabolism	ko00250	1 out of 118 0.847457627118644%	75 out of 5449 1.37639933932832%	0.808597	1	0.615706
Glycine, serine and threonine metabolism	ko00260	1 out of 118 0.847457627118644%	88 out of 5449 1.61497522481189%	0.85663	1	0.52475
Oxidative phosphorylation	ko00190	2 out of 118 1.69491525423729%	179 out of 5449 3.28500642319692%	0.905205	1	0.515955
Phagosome	ko04145	1 out of 118 0.847457627118644%	92 out of 5449 1.68838318957607%	0.868846	1	0.501934
RNA transport	ko03013	2 out of 118 1.69491525423729%	198 out of 5449 3.63369425582676%	0.932938	1	0.466444
Peroxisome	ko04146	1 out of 118 0.847457627118644%	102 out of 5449 1.87190310148651%	0.895053	1	0.452725
Pyruvate metabolism	ko00620	1 out of 118 0.847457627118644%	103 out of 5449 1.89025509267756%	0.897369	1	0.44833
Endocytosis	ko04144	2 out of 118 1.69491525423729%	218 out of 5449 4.00073407964764%	0.953797	1	0.423651
Pyrimidine metabolism	ko00240	1 out of 118 0.847457627118644%	128 out of 5449 2.34905487245366%	0.941333	1	0.360765
Purine metabolism	ko00230	1 out of 118 0.847457627118644%	169 out of 5449 3.10148651128647%	0.97669	1	0.273242
KEGGs enrichment using Cucurbita moschata (Rifu) Genome (CA stage vs.VB stage)
#Kegg_pathway	ko_id	Cluster_frequency	Genome_frequency	P-value	Corrected_P-value	rich_factor
Circadian rhythm - plant	ko04712	7 out of 61 11.4754098360656%	46 out of 5449 0.844191594788035%	5.89438e-07	2.65247e-05	13.5934
Phenylalanine metabolism	ko00360	5 out of 61 8.19672131147541%	65 out of 5449 1.19287942741787%	0.000734793	0.0330657	6.87137
Photosynthesis - antenna proteins	ko00196	3 out of 61 4.91803278688525%	26 out of 5449 0.47715177096715%	0.00288963	0.130034	10.3071
Carotenoid biosynthesis	ko00906	3 out of 61 4.91803278688525%	44 out of 5449 0.807487612405946%	0.0127647	0.574413	6.09054
alpha-Linolenic acid metabolism	ko00592	3 out of 61 4.91803278688525%	49 out of 5449 0.899247568361167%	0.0170717	0.768226	5.46905
Brassinosteroid biosynthesis	ko00905	1 out of 61 1.63934426229508%	14 out of 5449 0.256927876674619%	0.145979	1	6.38056
Thiamine metabolism	ko00730	1 out of 61 1.63934426229508%	17 out of 5449 0.311983850247752%	0.174418	1	5.25458
Arachidonic acid metabolism	ko00590	1 out of 61 1.63934426229508%	18 out of 5449 0.330335841438796%	0.183689	1	4.96266
Linoleic acid metabolism	ko00591	1 out of 61 1.63934426229508%	24 out of 5449 0.440447788585062%	0.237203	1	3.72199
Fatty acid degradation	ko00071	2 out of 61 3.27868852459016%	52 out of 5449 0.9543035419343%	0.114604	1	3.43569
Valine, leucine and isoleucine degradation	ko00280	2 out of 61 3.27868852459016%	55 out of 5449 1.00935951550743%	0.1257	1	3.24829
Glycerophospholipid metabolism	ko00564	4 out of 61 6.55737704918033%	111 out of 5449 2.03707102220591%	0.0350208	1	3.21902
Ether lipid metabolism	ko00565	1 out of 61 1.63934426229508%	33 out of 5449 0.60561570930446%	0.311066	1	2.70691
Glycerolipid metabolism	ko00561	2 out of 61 3.27868852459016%	67 out of 5449 1.22958340979996%	0.172288	1	2.6665
Biosynthesis of unsaturated fatty acids	ko01040	1 out of 61 1.63934426229508%	34 out of 5449 0.623967700495504%	0.318826	1	2.62729
Cutin, suberine and wax biosynthesis	ko00073	1 out of 61 1.63934426229508%	35 out of 5449 0.642319691686548%	0.326499	1	2.55222
Phenylpropanoid biosynthesis	ko00940	6 out of 61 9.83606557377049%	211 out of 5449 3.87227014131033%	0.0296487	1	2.54013
Protein processing in endoplasmic reticulum	ko04141	6 out of 61 9.83606557377049%	220 out of 5449 4.03743806202973%	0.0353701	1	2.43621
Cysteine and methionine metabolism	ko00270	3 out of 61 4.91803278688525%	115 out of 5449 2.11047898697009%	0.137284	1	2.33029
Glutathione metabolism	ko00480	2 out of 61 3.27868852459016%	87 out of 5449 1.59662323362085%	0.254478	1	2.05351
Sulfur metabolism	ko00920	1 out of 61 1.63934426229508%	44 out of 5449 0.807487612405946%	0.391842	1	2.03018
Glycine, serine and threonine metabolism	ko00260	2 out of 61 3.27868852459016%	88 out of 5449 1.61497522481189%	0.258651	1	2.03018
Photosynthesis	ko00195	2 out of 61 3.27868852459016%	92 out of 5449 1.68838318957607%	0.275353	1	1.94191
Fatty acid metabolism	ko01212	2 out of 61 3.27868852459016%	94 out of 5449 1.72508717195816%	0.283703	1	1.90059
beta-Alanine metabolism	ko00410	1 out of 61 1.63934426229508%	50 out of 5449 0.917599559552211%	0.431897	1	1.78656
Nitrogen metabolism	ko00910	1 out of 61 1.63934426229508%	50 out of 5449 0.917599559552211%	0.431897	1	1.78656
Peroxisome	ko04146	2 out of 61 3.27868852459016%	102 out of 5449 1.87190310148651%	0.317	1	1.75153
Carbon fixation in photosynthetic organisms	ko00710	2 out of 61 3.27868852459016%	105 out of 5449 1.92695907505964%	0.329413	1	1.70148
Phenylalanine, tyrosine and tryptophan biosynthesis	ko00400	1 out of 61 1.63934426229508%	54 out of 5449 0.991007524316388%	0.457147	1	1.65422
Endocytosis	ko04144	4 out of 61 6.55737704918033%	218 out of 5449 4.00073407964764%	0.226577	1	1.63904
Terpenoid backbone biosynthesis	ko00900	1 out of 61 1.63934426229508%	57 out of 5449 1.04606349788952%	0.475357	1	1.56716
Ubiquitin mediated proteolysis	ko04120	2 out of 61 3.27868852459016%	123 out of 5449 2.25729491649844%	0.402376	1	1.45249
Plant hormone signal transduction	ko04075	6 out of 61 9.83606557377049%	382 out of 5449 7.0104606349789%	0.254143	1	1.40306
Carbon metabolism	ko01200	5 out of 61 8.19672131147541%	329 out of 5449 6.03780510185355%	0.307088	1	1.35757
Citrate cycle (TCA cycle)	ko00020	1 out of 61 1.63934426229508%	69 out of 5449 1.26628739218205%	0.542376	1	1.29461
2-Oxocarboxylic acid metabolism	ko01210	1 out of 61 1.63934426229508%	69 out of 5449 1.26628739218205%	0.542376	1	1.29461
Biosynthesis of amino acids	ko01230	4 out of 61 6.55737704918033%	279 out of 5449 5.12020554230134%	0.381151	1	1.28069
Arginine and proline metabolism	ko00330	1 out of 61 1.63934426229508%	70 out of 5449 1.2846393833731%	0.547565	1	1.27611
Spliceosome	ko03040	3 out of 61 4.91803278688525%	215 out of 5449 3.94567810607451%	0.434761	1	1.24644
Alanine, aspartate and glutamate metabolism	ko00250	1 out of 61 1.63934426229508%	75 out of 5449 1.37639933932832%	0.572652	1	1.19104
Plant-pathogen interaction	ko04626	2 out of 61 3.27868852459016%	162 out of 5449 2.97302257294916%	0.546139	1	1.10281
Inositol phosphate metabolism	ko00562	1 out of 61 1.63934426229508%	91 out of 5449 1.67003119838502%	0.644087	1	0.981625
Starch and sucrose metabolism	ko00500	3 out of 61 4.91803278688525%	330 out of 5449 6.05615709304459%	0.724145	1	0.812072
Amino sugar and nucleotide sugar metabolism	ko00520	1 out of 61 1.63934426229508%	161 out of 5449 2.95467058175812%	0.841153	1	0.554831
Pentose and glucuronate interconversions	ko00040	1 out of 61 1.63934426229508%	173 out of 5449 3.17489447605065%	0.861819	1	0.516346
