# Supplementary material for: Transcriptomic analysis of melon/squash graft junction reveals molecular mechanisms potentially underlying the graft union development
Source: PeerJ. 2021 Dec 13;9:e12569. doi: 10.7717/peerj.12569 (PMC8675255; doi:10.7717/peerj.12569)
Supplement: Supplemental Information 9 [file peerj-09-12569-s009.xlsx]

## Sheet: Sheet1
Fig.8. The content of lignin at the graft healing process.
Graft healing process	OD			av	mg/ml			av(mg/ml)	mg/g			av(mg/g)	st	P<0.05
IL	1.5474	1.6148	1.51499	1.55906	0.120376	0.125634	0.117848	0.121286	12.0376	12.5634	11.7848	12.1286	0.355253	c
CA	1.9225	2.2439	1.9963	2.05423	0.149637	0.174709	0.155394	0.159914	14.9637	17.4709	15.5394	15.9914	1.17464	b
VB	2.6612	2.8621	2.8545	2.7926	0.207263	0.222935	0.222342	0.217513	20.7263	22.2935	22.2342	21.7513	0.794436	a
