# Supplementary material for: Transcriptomic analysis of melon/squash graft junction reveals molecular mechanisms potentially underlying the graft union development
Source: PeerJ. 2021 Dec 13;9:e12569. doi: 10.7717/peerj.12569 (PMC8675255; doi:10.7717/peerj.12569)
Supplement: Supplemental Information 10 [file peerj-09-12569-s010.xlsx]

## Sheet: Sheet1
Fig.6. The hormone content during the graft healing process.
IAA content (ng/g·FW)				av	st	P<0.05
IL	49.5513	46.4264	49.7879	48.5885	1.6781	a
CA	33.7508	33.7438	32.3135	33.2694	0.740431	c
VB	43.4106	45.972	43.1577	44.1801	1.39259	b
ABA content (ng/g·FW)				av	st
IL	87.0257	94.9682	75.0179	85.6706	8.98357	a
CA	28.8285	32.1541	35.2422	32.075	2.86895	b
VB	33.3913	32.9187	33.1522	33.1541	0.211327	b
ZR content (ng/g·FW)				av	st
IL	6.39045	6.51149	5.63899	6.18031	0.422785	c
CA	7.61365	7.0631	7.92958	7.53544	0.39221	b
VB	8.152	8.27176	8.80869	8.41082	0.312808	a
GA3 content (ng/g·FW)				av	st
IL	5.75284	6.01012	5.04522	5.60273	0.446905	b
CA	5.33189	5.99629	6.22133	5.84984	0.413631	b
VB	7.16429	7.75284	7.70009	7.53907	0.291263	a
