# Supplementary material for: Transcriptomic analysis of melon/squash graft junction reveals molecular mechanisms potentially underlying the graft union development
Source: PeerJ. 2021 Dec 13;9:e12569. doi: 10.7717/peerj.12569 (PMC8675255; doi:10.7717/peerj.12569)
Supplement: Supplemental Information 11 [file peerj-09-12569-s011.xlsx]

## Sheet: Sheet1
Fig.9. Differential gene verification in the graft healing process
CmoCh07G009530				av	st	P<0.05
IL	0.208772	0.329877	0.133972	0.224207	0.0884235	b
CA	0.0688691	0.0620683	0.0902456	0.0737276	0.0131513	c
VB	0.562529	0.503478	0.547147	0.537718	0.0274	a
CmoCh08G005650				av	st
IL	0.0196408	0.0255594	0.0285572	0.0245858	0.00405822	a
CA	0.00230663	0.00349619	0.00497875	0.00359386	0.0011974	b
VB	0.0253829	0.0193704	0.0255594	0.0234376	0.00315139	a
CmoCh08G003030				av	st
IL	0.0712977	0.059954	0.0733022	0.0681846	0.00643813	a
CA	0.0236831	0.0354026	0.0180733	0.0257196	0.00790886	b
VB	0.0214928	0.0295643	0.0264608	0.0258393	0.00364163	b
CmoCh20G005830				av	st
IL	0.00955188	0.00587987	0.0044871	0.00663962	0.00234024	a
CA	0.00148019	0.000850147	0.000553166	0.000961168	0.000423404	b
VB	0.00321715	0.00511872	0.00803214	0.00545601	0.00216912	a
MELO3C034560.2				av	st
IL	0.0107464	0.0104526	0.0094859	0.0102283	0.000589882	c
CA	0.0188407	0.0197774	0.0248605	0.0211596	0.00289718	b
VB	0.0532897	0.0500669	0.0409498	0.0481021	0.00572457	a
MELO3C026019.2				av	st
IL	0.0149885	0.0178244	0.0156785	0.0161638	0.00132281	a
CA	0.00369554	0.00243815	0.00263132	0.00292167	0.000605631	c
VB	0.00670754	0.00684848	0.00759887	0.00705163	0.000428548	b
MELO3C010317.2				av	st
IL	0.0196408	0.0255594	0.0285572	0.0245858	0.00405822	a
CA	0.00230663	0.00349619	0.00497875	0.00359386	0.0011974	b
VB	0.0253829	0.0193704	0.0255594	0.0234376	0.00315139	a
MELO3C015359.2				av	st
IL	1.00265	1.07549	0.929805	1.00265	0.0651543	b
CA	17.897	15.4506	16.2016	16.5164	1.12089	a
VB	1.35579	1.21982	1.09177	1.22246	0.118093	b
MELO3C014091.2				av	st
IL	0.0147822	0.00929068	0.00982042	0.0112977	0.00270938	b
CA	0.0162885	0.0712977	0.0209051	0.0361638	0.0272928	b
VB	0.271684	0.196146	0.214641	0.22749	0.0352171	a
MELO3C004382.2				av	st
IL	1.22274	0.836664	0.856584	0.971995	0.194428	c
CA	2.48507	2.16632	2.96383	2.53841	0.359039	b
VB	4.71691	3.78698	3.85195	4.11861	0.46435	a
MELO3C007691.2				av	st
IL	1.08673	0.732043	1.25701	1.02526	0.239554	c
CA	2.21982	2.43335	2.64689	2.43335	0.190992	b
VB	4.63761	3.90962	5.4656	4.67094	0.696332	a
MELO3C015880.2				av	st
IL	1.0163	0.866537	1.1355	1.00612	0.120545	a
CA	0.860053	0.883883	0.896222	0.880053	0.0164453	b
VB	0.784584	0.531233	0.673617	0.663145	0.113592	c
